# Supplementary material for: A zwitterionic macro-crosslinker for durable non-fouling coatings
Source: Royal Society of Chemistry journal article supplement (doi:10.1039/c6cc00109b), 2016-01-01
Supplement: c6cc00109b1.pdf [file c6cc00109b1.pdf]

## Zwitterionic macro-crosslinker for durable non-fouling coating

Wei Wang, Yang Lu, Jinbing Xie, Hui Zhu and Zhiqiang Cao\*

Department of Chemical Engineering and Material Science, Wayne State University, Detroit, Michigan 48202, Unit States

### Supporting information

#### Material

2-Aminoethyl methacrylate hydro-chloride (NH<sub>2</sub>-MA monomer, 90%), Tert-Butyl bromoacetate (98%), 2-(Dimethylamino) ethyl methacrylate (DMA 98%), N,N-Methylenebis(acrylamide) (MBAA, 99%), Anhydrous DMF, Anhydrous Acetone (99.99%) and Anhydrous methanol were purchased from Sigma-Aldrich, St. Louis, MO. Triethylamine (TEA, 99%), trifluoroacetic acid (TFA, 99.9%) and Ethyl Ether anhydrous (99.9%) were obtained from Fisher Chemical. Co. Deuterium Oxide (D<sub>2</sub>O 99.9%) and Dimethyl sulfoxide-D<sub>6</sub> (D-DMSO, 99.9%) were obtained from Cambridge Isotope Laboratories, Inc. USA.

#### Synthesis of PCBMA-tBu monomer

The synthesis procedure was as reported previously<sup>1</sup>. Briefly 5 g 2-(Dimethylamino)ethyl methacrylate and 8.68 g tert-butyl bromoacetate were reacted in 20 ml acetonitrile for 24 h at 50 °C under N<sub>2</sub> protection. Upon addition of 250 ml ethyl ether to the reaction mixture, the white crystals were isolated and dried. The resulting CBMA-tBu monomers were immediately stored in a desiccator at -20 °C (yield 96%)

#### Synthesis of PCBMA macro-crosslinker

The polymerization solvent was prepared by dissolving 5 mg 2-Hydroxy-4-(2-hydroxyethoxy)-2-methylpropiophenone (photo-initiator, I-2959) in anhydrous DMF. The CBMA-tBu ester monomer was first copolymerized with 2-Aminoethyl methacrylate hydro-chloride (NH<sub>2</sub>MA monomer) at different molar ratio (10:1, 30:1 and 50:1) in the polymerization solvent (35% by weight) under UV for 10 min and the resulting polymer A was precipitated in anhydrous acetone. Unreacted monomer was washed away by re-dissolving the product in DMF and precipitated in acetone for additional two times (polymer yield: 56%). The purified copolymer A was then reacted with acryloyl chloride (3 times of the amount of NH<sub>2</sub> function group) in presence of triethylamine in anhydrous DMF (10% by weight) for 5 h at room temperature followed by precipitation in anhydrous ethyl ether and vacuum dry (polymer B, yield: 87%). Lastly, copolymer B was stirred in trifluoroacetic acid (20% by weight) to remove tBu ester protection and neutralized using triethylamine (TEA) to pH=7 in anhydrous methanol on ice bath. The obtained zwitterionic macro-crosslinker C was precipitated in ethyl ether and dried in vacuum (macro-crosslinker C yield: 91%; overall yield: 44%).

#### Characterization

The molecular weight of the macro-crosslinker and surface initiated polymer (obtained by ultrasonic treatment after coating) were determined by gel permeation chromatography (GPC) on a Waters Alliance 2695 Separations Module equipped with a Waters Ultrahydrogel Linear column and a Waters 2414 reflex detector. The mobile phase was PBS buffer solution at a flow rate of 0.7 ml/min at 35 °C. Poly(ethylene oxide) from Polymer Laboratories were used as standards. The synthesized products were examined using a Varian Mercury-400 MHz NMR. In Figure 2 of the main text, the product A and B were dissolved in D-DMSO and product C was dissolved in D<sub>2</sub>O. The coating thickness was characterized by surface ellipsometry and averaged from three measurements at different surface sites ( $\alpha$ -SETM, J.A. Woollam Co., Inc.).

#### Protein adsorption:

To measure the fibrinogen (Fg, Sigma-Aldrich) adsorption on PCBMA macrocrosslinker coating, coated surface (either by PCBMA brush or PCBMA macrocrosslinker) and bare PU surface were incubated with 1mg/ml Fg in a well plate for 10 minutes at room temperature, followed by 5 washes with PBS buffer. Samples were then incubated with 1 mg/ml bovine serum albumin solution for 10 minutes at room temperature with 5 times wash again with PBS buffer. The tested surface were then removed from the fifth PBS wash and transferred to new wells. They were next incubated with a 1:200-dilution of horseradish peroxidase (HRP)-conjugated anti-fibrinogen in PBS for 10 minutes, followed by another 5 washes with the same buffer. After the fifth wash, the tested surfaces were transferred to new wells and SIGMAFAST OPD was added to each well at 30-second intervals. The surfaces were incubated in the OPD solution for 30 minutes away from light. The supernatant was removed from each test well, transferred to a cuvette, and its absorbance at 490 nm was measured. All samples were measured in triplicate.

#### Bacteria adhesion and SEM image

After bacteria adhesion on PU, the surface will be immersed in the fix solution of 2.5% glutaraldehyde, 2% paraformaldehyde in 0.1 M sodium phosphate buffer. The surface was then dehydrated in a gradient ethanol series and dried in vacuum. Before imaging, the surface sample was coated with nano-gold using a SEEVac Conductive IV sputter coater. The bacteria were imaged using a JSM - 6510LV SEM at 5  $\mu$ m magnification and bacteria adhesion density was calculated by counting the bacteria number per 900  $\mu$ m<sup>2</sup>.

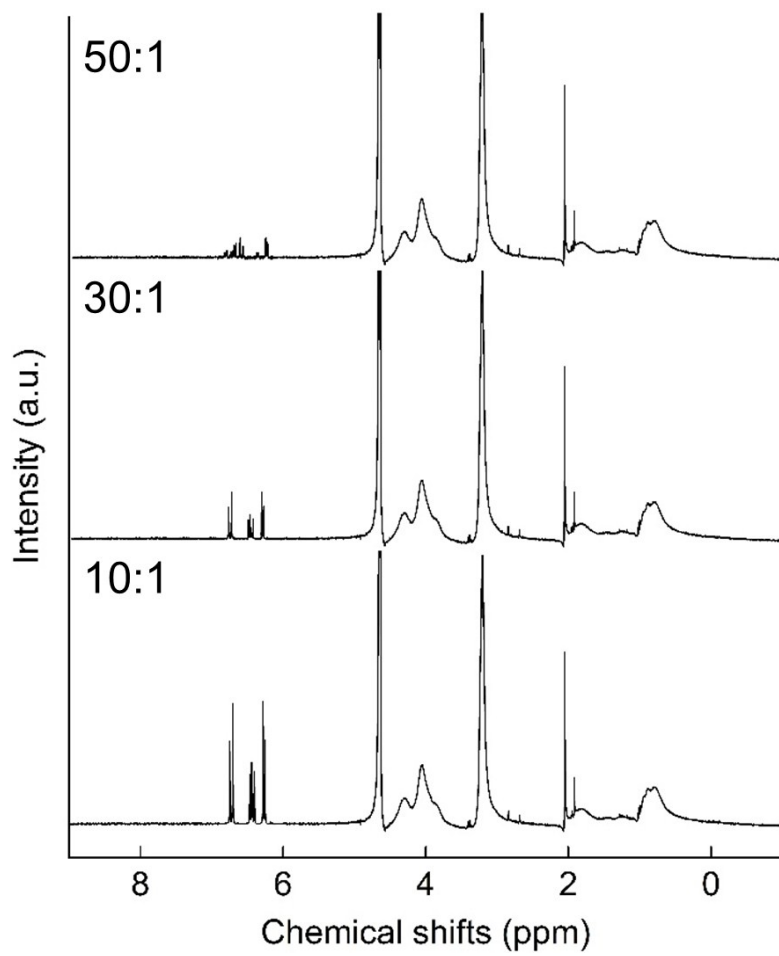

Figure S1 <sup>1</sup>H NMR of PCBMA macro-crosslinker with different double bond density (labeled by CBMA/double bond molar ratio).

## Reference

1. Z. Cao, Q. Yu, H. Xue, G. Cheng and S. Jiang, *Angewandte Chemie*, 2010, 122, 3859-3864.
